# Supplementary material for: Non-coding RNAome of RPE cells under oxidative stress suggests unknown regulative aspects of Retinitis pigmentosa etiopathogenesis
Source: PubMed Central journal article supplement (PMC6226517; doi:10.1038/s41598-018-35086-z), 2018-11-09
Supplement: 41598_2018_35086_MOESM1_ESM.pdf [file 41598_2018_35086_MOESM1_ESM.pdf]

**Title page:**

Non-coding RNAome of RPE cells under oxidative stress suggests unknown regulative aspects of Retinitis pigmentosa etiopathogenesis

**Author list:**

Luigi Donato, Concetta Scimone, Carmela Rinaldi, Rosalia D'Angelo, Antonina Sidoti

## Supporting information captions

**Supplementary Table 1. RNA-Seq Statistics.** In this table information on input data transcriptome analysis is reported.

**Supplementary Table 2. ncRNAs expression variations throughout all analyzed time points.**

All selected ncRNAs showed particular fold-change trends, between treated and untreated samples, during evaluated time points (0h, 1h, 2h, 4h, 6h). All results were statistically validated by Bonferroni-corrected EDGE test, and p-values are all about 0 (values not shown). Global ncRNA parameters: Reference gene name=The gene\_name attribute of the reference GTF record for this transcript, if present; otherwise gene\_id is used. Reference transcript id=The transcript\_id attribute of the reference GTF record for this transcript. Class code=The type of relationship between the Cufflinks transcripts and the reference transcript. Cufflinks gene id=The Cufflinks internal gene id. Cufflinks transcript id=The Cufflinks internal transcript id. Fraction of major isoform (FMI)=The expression of this transcript expressed as a fraction of the major isoform for the gene; Ranges from 1 to 100. Length=The length of the transcript. Major isoform ID=The Cufflinks ID of the gene's major isoform. Reference match length=The length of reference transcript. CircRNAs specific parameters: IsoformName=Name of isoform. Chrom=Chromosome. Start=Start of circular RNA. End=End of circular RNA. Name=Circular RNA/Junction reads. Strand=+ or - for strand. ExonSizes=Exon sizes. ExonOffsets=Exon offsets. CircType=Type of circular RNA. GeneName=Name of gene. Index=Index of exon or intron.

**Supplementary Table 3. qRT-PCR data for ncRNA expression validation.** In this table fold-changes values for 20 most dysregulated ncRNAs involved in the highest number of biochemical pathways are reported. qRT-PCR results (columns with gray background) confirm RNA-Seq expression data (columns with white background). T = Treated sample. U = Untreated sample.

**Supplementary Table 4. CircInteractome results of RNA-binding protein sites and miRNAs matching to circular RNAs.** Table shows RBPs binding in different regions of analyzed circRNAs or in their flanking regions, along with TargetScan predictions of miRNAs “sponged” by given circRNAs.

**Supplementary Table 5. Read mapping settings for exploited aligners.** In this table specific parameters for CLC Genomics Workbench, TopHat2 and STAR aligners are reported.
