# Supplementary material for: Non-coding RNAome of RPE cells under oxidative stress suggests unknown regulative aspects of Retinitis pigmentosa etiopathogenesis
Source: PubMed Central journal article supplement (PMC6226517; doi:10.1038/s41598-018-35086-z), 2018-11-09
Supplement: 41598_2018_35086_MOESM2_ESM.pdf [file 41598_2018_35086_MOESM2_ESM.pdf]

**Manuscript title:**

Non-coding RNAome of RPE cells under oxidative stress suggests unknown regulative aspects of Retinitis pigmentosa etiopathogenesis

**Author list:**

Luigi Donato, Concetta Scimone, Carmela Rinaldi, Rosalia D'Angelo, Antonina Sidoti

**GLOBALS**

|                          |                     |
|--------------------------|---------------------|
| Number of reads          | 11,214,300          |
| Mapped reads             | 11,083,950 / 98.84% |
| Unmapped reads           | 130,350 / 1.16%     |
| Read min/max/mean length | 25 / 339 / 155.03   |
| Duplication rate         | 37.19%              |
| Mean Mapping Quality     | 32.92               |

**ACGT CONTENT**

|                          |                      |
|--------------------------|----------------------|
| Number/percentage of A's | 265,538,091 / 23.86% |
| Number/percentage of C's | 295,406,976 / 26.54% |
| Number/percentage of T's | 262,169,642 / 23.56% |
| Number/percentage of G's | 289,877,656 / 26.04% |
| Number/percentage of N's | 0 / 0%               |
| GC Percentage            | 52.59%               |

**FRAGMENT COUNTING**

|                     | Single     | % of Total | Paired | % of Total | Total      | % of Total Fragments |
|---------------------|------------|------------|--------|------------|------------|----------------------|
| Counted fragments   | 7,569,891  | 100        | 0      | 0          | 7,569,891  | 67.5                 |
| - unique fragments  | 6,518,196  | 100        | 0      | 0          | 6,518,196  | 58.12                |
| - non-specifically  | 1,051,695  | 100        | 0      | 0          | 1,051,695  | 9.38                 |
| Uncounted fragments | 3,644,409  | 100        | 0      | 0          | 3,644,409  | 32.5                 |
| Total fragments     | 11,214,300 | 100        | 0      | 0          | 11,214,300 | 100                  |

**COUNTED FRAGMENTS BY TYPE (TOTAL)**

|            | Uniquely mapped | Fraction | Non-specifically mapped | Fraction | Mapped    | % of total mapped |
|------------|-----------------|----------|-------------------------|----------|-----------|-------------------|
| Exon       | 2,732,984       | 0.81     | 639,430                 | 0.19     | 3,372,414 | 44.55             |
| Exon-exon  | 3,274,971       | 0.94     | 227,383                 | 0.06     | 3,502,354 | 46.27             |
| Total exon | 6,007,955       | 0.87     | 866,813                 | 0.13     | 6,874,768 | 90.82             |
| Intron     | 510             | 0.73     | 184,882                 | 0.27     | 695,123   | 9.18              |
| Total gene | 6,518,196       | 0.86     | 1,051,695               | 0.14     | 7,569,891 | 100               |
