# Supplementary material for: Non-coding RNAome of RPE cells under oxidative stress suggests unknown regulative aspects of Retinitis pigmentosa etiopathogenesis
Source: PubMed Central journal article supplement (PMC6226517; doi:10.1038/s41598-018-35086-z), 2018-11-09
Supplement: 41598_2018_35086_MOESM4_ESM.pdf [file 41598_2018_35086_MOESM4_ESM.pdf]

**Manuscript title:**

Non-coding RNAome of RPE cells under oxidative stress suggests unknown regulative aspects of Retinitis pigmentosa etiopathogenesis

**Author list:**

Luigi Donato, Concetta Scimone, Carmela Rinaldi, Rosalia D'Angelo, Antonina Sidoti

| <b>ncRNA</b>   | <b>1h (T vs U)</b> | <b>1h (T vs U)</b> | <b>2h (T vs U)</b> | <b>2h (T vs U)</b> | <b>4h (T vs U)</b> | <b>4h (T vs U)</b> | <b>6h (T vs U)</b> | <b>6h (T vs U)</b> |
|----------------|--------------------|--------------------|--------------------|--------------------|--------------------|--------------------|--------------------|--------------------|
| NBPF12         | -1,12              | -1,66              | -2,38              | -3,17              | 1,74               | 2,58               | 0,51               | 0,77               |
| VIM            | -2,00              | -2,74              | 1,22               | 1,63               | 0,00               | 0,00               | -2,81              | -4,10              |
| LINC01184      | 1,05               | 1,56               | 2,77               | 3,68               | 0,53               | 0,78               | 1,20               | 1,82               |
| LINC00663      | 1,78               | 2,63               | 0,00               | 0,00               | 1,03               | 1,49               | 0,27               | 0,40               |
| LINC00852      | 2,19               | 3,11               | 0,00               | 0,00               | -2,56              | -3,79              | 0,62               | 0,87               |
| LINC00476      | 3,15               | 4,66               | -0,47              | -0,63              | -0,12              | -0,18              | 0,03               | 0,05               |
| RP11-770J1,3   | 0,27               | 0,40               | 3,62               | 4,81               | 3,60               | 5,25               | 0,37               | 0,56               |
| RP1-20B21,4    | 0,05               | 0,07               | 2,17               | 2,95               | 1,48               | 2,20               | 0,18               | 0,27               |
| RP11-380M21,4  | 0,51               | 0,76               | 3,51               | 4,66               | 0,55               | 0,77               | 0,57               | 0,86               |
| RP11-49K24,4   | 0,19               | 0,29               | 2,31               | 3,07               | 0,00               | 0,00               | 1,15               | 1,73               |
| RABGAP1L-IT1   | 2,12               | 3,08               | 3,29               | 4,34               | 0,35               | 0,53               | -1,55              | -2,03              |
| WWTR1-IT1      | 3,59               | 5,32               | 0,05               | 0,06               | 3,31               | 4,90               | 0,50               | 0,76               |
| ARHGEF9-IT1    | -2,26              | -3,12              | 1,61               | 2,07               | -2,12              | -2,96              | -0,98              | -1,40              |
| ZBTB40-IT1     | -3,32              | -4,91              | 0,21               | 0,28               | 0,05               | 0,08               | 0,31               | 0,46               |
| CTB-25J19,9    | -0,22              | -0,33              | 2,95               | 3,92               | 3,27               | 4,84               | -3,47              | -5,23              |
| CTC-228N24,3   | 1,05               | 1,56               | 2,77               | 3,68               | 0,53               | 0,75               | 1,20               | 1,78               |
| CTD-2024P10,1  | -0,17              | -0,25              | 2,31               | 3,16               | -1,06              | -1,57              | 0,40               | 0,61               |
| PCCA-AS1       | 0,82               | 1,21               | 2,30               | 3,06               | -1,00              | -1,47              | 0,58               | 0,87               |
| piR-32067      | -2,20              | -3,25              | -1,01              | -1,34              | 0,24               | 0,35               | -0,49              | -0,74              |
| piR-45471-L475 | -1,29              | -1,91              | 2,25               | 3,01               | -1,41              | -2,08              | 0,49               | 0,74               |
