# Supplementary material for: Non-coding RNAome of RPE cells under oxidative stress suggests unknown regulative aspects of Retinitis pigmentosa etiopathogenesis
Source: PubMed Central journal article supplement (PMC6226517; doi:10.1038/s41598-018-35086-z), 2018-11-09
Supplement: 41598_2018_35086_MOESM5_ESM.pdf [file 41598_2018_35086_MOESM5_ESM.pdf]

**Manuscript title:**

Non-coding RNAome of RPE cells under oxidative stress suggests unknown regulative aspects of Retinitis pigmentosa etiopathogenesis

**Author list:**

Luigi Donato, Concetta Scimone, Carmela Rinaldi, Rosalia D'Angelo, Antonina Sidoti

| CircRNA ID              | Gene Symbol | RBP     | Binding Sites  | miRNA          | #Sites         |   |
|-------------------------|-------------|---------|----------------|----------------|----------------|---|
| <i>hsa_circ_0007345</i> | DLG1        | O2      | 4              | hsa-miR-1208   | 1              |   |
|                         |             | DGCR8   | 1              | hsa-miR-1229   | 1              |   |
|                         |             | EIF4A3  | 9              | hsa-miR-1231   | 1              |   |
|                         |             | FMRP    | 1              | hsa-miR-1248   | 1              |   |
|                         |             | HuR     | 3              | hsa-miR-1252   | 1              |   |
|                         |             | IGF2BP2 | 1              | hsa-miR-1253   | 1              |   |
|                         |             | IGF2BP3 | 1              | hsa-miR-1270   | 1              |   |
|                         |             | LIN28A  | 3              | hsa-miR-1278   | 1              |   |
|                         |             | LIN28B  | 1              | hsa-miR-1305   | 1              |   |
|                         |             | PTB     | 1              | hsa-miR-136    | 1              |   |
|                         |             | ZC3H7B  | 1              | hsa-miR-149    | 2              |   |
|                         |             |         |                |                | hsa-miR-338-3p | 1 |
|                         |             |         |                |                | hsa-miR-409-3p | 1 |
|                         |             |         |                |                | hsa-miR-421    | 1 |
|                         |             |         |                |                | hsa-miR-503    | 1 |
|                         |             |         |                |                | hsa-miR-515-5p | 3 |
|                         |             |         |                |                | hsa-miR-577    | 1 |
|                         |             |         |                |                | hsa-miR-589    | 1 |
|                         |             |         |                |                | hsa-miR-620    | 1 |
|                         |             |         |                |                | hsa-miR-623    | 1 |
|                         |             |         |                |                | hsa-miR-630    | 1 |
|                         |             |         |                |                | hsa-miR-638    | 1 |
|                         |             |         |                |                | hsa-miR-646    | 1 |
|                         |             |         |                |                | hsa-miR-649    | 1 |
|                         |             |         |                |                | hsa-miR-653    | 1 |
|                         |             |         |                |                | hsa-miR-661    | 1 |
|                         |             |         |                |                | hsa-miR-671-5p | 1 |
|                         |             |         | hsa-miR-758    | 1              |                |   |
|                         |             |         | hsa-miR-767-3p | 2              |                |   |
|                         |             |         | hsa-miR-942    | 1              |                |   |
| <i>hsa_circ_0064644</i> | RBMS3       | EIF4A3  | 3              | hsa-miR-1183   | 1              |   |
|                         |             | FUS     | 1              | hsa-miR-153    | 1              |   |
|                         |             |         |                | hsa-miR-1827   | 1              |   |
|                         |             |         |                | hsa-miR-183    | 1              |   |
|                         |             |         |                | hsa-miR-330-3p | 1              |   |
|                         |             |         |                | hsa-miR-492    | 1              |   |
|                         |             |         |                | hsa-miR-507    | 1              |   |
|                         |             |         |                | hsa-miR-545    | 1              |   |
|                         |             |         |                | hsa-miR-557    | 1              |   |
|                         |             |         |                | hsa-miR-576-3p | 1              |   |
|                         |             |         |                | hsa-miR-615-5p | 1              |   |
|                         |             |         |                | hsa-miR-637    | 1              |   |
|                         |             |         |                | hsa-miR-652    | 1              |   |
|                         |             |         |                | hsa-miR-654-3p | 1              |   |
|                         |             |         |                | hsa-miR-885-3p | 1              |   |
| <i>hsa_circ_0067946</i> | TNIK        | AGO2    | 2              | hsa-miR-1184   | 1              |   |
|                         |             | EIF4A3  | 12             | hsa-miR-1200   | 1              |   |

|                         |      |        |    |                 |   |
|-------------------------|------|--------|----|-----------------|---|
|                         |      | HuR    | 2  | hsa-miR-1208    | 1 |
|                         |      |        |    | hsa-miR-1296    | 1 |
|                         |      |        |    | hsa-miR-1305    | 1 |
|                         |      |        |    | hsa-miR-151-3p  | 1 |
|                         |      |        |    | hsa-miR-203     | 1 |
|                         |      |        |    | hsa-miR-224     | 1 |
|                         |      |        |    | hsa-miR-331-3p  | 1 |
|                         |      |        |    | hsa-miR-375     | 1 |
|                         |      |        |    | hsa-miR-383     | 1 |
|                         |      |        |    | hsa-miR-492     | 1 |
|                         |      |        |    | hsa-miR-512-5p  | 1 |
|                         |      |        |    | hsa-miR-513a-5p | 1 |
|                         |      |        |    | hsa-miR-526b    | 1 |
|                         |      |        |    | hsa-miR-545     | 1 |
|                         |      |        |    | hsa-miR-548l    | 1 |
|                         |      |        |    | hsa-miR-571     | 1 |
|                         |      |        |    | hsa-miR-599     | 1 |
|                         |      |        |    | hsa-miR-629     | 1 |
|                         |      |        |    | hsa-miR-646     | 2 |
|                         |      |        |    | hsa-miR-657     | 1 |
|                         |      |        |    | hsa-miR-668     | 1 |
|                         |      |        |    | hsa-miR-766     | 2 |
|                         |      |        |    | hsa-miR-767-3p  | 2 |
|                         |      |        |    | hsa-miR-874     | 1 |
|                         |      |        |    | hsa-miR-889     | 1 |
|                         |      |        |    | hsa-miR-938     | 1 |
|                         |      |        |    | hsa-miR-95      | 1 |
| <hr/>                   |      |        |    |                 |   |
| <i>hsa_circ_0080164</i> | TNS3 | AGO2   | 1  | hsa-miR-1179    | 1 |
|                         |      | EIF4A3 | 13 | hsa-miR-1197    | 1 |
|                         |      | FUS    | 1  | hsa-miR-1205    | 1 |
|                         |      | PTB    | 1  | hsa-miR-1256    | 1 |
|                         |      |        |    | hsa-miR-1257    | 1 |
|                         |      |        |    | hsa-miR-1265    | 1 |
|                         |      |        |    | hsa-miR-1286    | 1 |
|                         |      |        |    | hsa-miR-1287    | 1 |
|                         |      |        |    | hsa-miR-1294    | 1 |
|                         |      |        |    | hsa-miR-1322    | 1 |
|                         |      |        |    | hsa-miR-139-3p  | 1 |
|                         |      |        |    | hsa-miR-145     | 1 |
|                         |      |        |    | hsa-miR-153     | 1 |
|                         |      |        |    | hsa-miR-197     | 2 |
|                         |      |        |    | hsa-miR-198     | 1 |
|                         |      |        |    | hsa-miR-203     | 1 |
|                         |      |        |    | hsa-miR-370     | 1 |
|                         |      |        |    | hsa-miR-488     | 1 |
|                         |      |        |    | hsa-miR-510     | 1 |
|                         |      |        |    | hsa-miR-518a-5p | 1 |
|                         |      |        |    | hsa-miR-527     | 1 |

|                         |     |          |    |                 |   |
|-------------------------|-----|----------|----|-----------------|---|
|                         |     |          |    | hsa-miR-578     | 2 |
|                         |     |          |    | hsa-miR-579     | 1 |
|                         |     |          |    | hsa-miR-581     | 2 |
|                         |     |          |    | hsa-miR-636     | 1 |
|                         |     |          |    | hsa-miR-649     | 1 |
|                         |     |          |    | hsa-miR-657     | 1 |
|                         |     |          |    | hsa-miR-873     | 1 |
| <i>hsa_circ_0017874</i> | VIM | AGO1     | 1  | hsa-miR-1184    | 1 |
|                         |     | AGO2     | 6  | hsa-miR-1200    | 1 |
|                         |     | C22ORF28 | 1  | hsa-miR-1205    | 1 |
|                         |     | CAPRIN1  | 1  | hsa-miR-1279    | 1 |
|                         |     | DGCR8    | 2  | hsa-miR-1288    | 1 |
|                         |     | EIF4A3   | 2  | hsa-miR-1290    | 2 |
|                         |     | FMRP     | 13 | hsa-miR-1294    | 1 |
|                         |     | IGF2BP1  | 3  | hsa-miR-370     | 1 |
|                         |     | IGF2BP2  | 1  | hsa-miR-494     | 1 |
|                         |     | IGF2BP3  | 3  | hsa-miR-510     | 1 |
|                         |     | LIN28A   | 1  | hsa-miR-512-5p  | 1 |
|                         |     | PTB      | 2  | hsa-miR-513a-5p | 1 |
|                         |     | SFRS1    | 1  | hsa-miR-545     | 1 |
|                         |     | ZC3H7B   | 1  | hsa-miR-598     | 1 |
|                         |     |          |    | hsa-miR-616     | 1 |
|                         |     |          |    | hsa-miR-657     | 1 |
|                         |     |          |    | hsa-miR-661     | 1 |
|                         |     |          |    | hsa-miR-885-3p  | 2 |
|                         |     |          |    | hsa-miR-890     | 1 |
