# Supplementary material for: Non-coding RNAome of RPE cells under oxidative stress suggests unknown regulative aspects of Retinitis pigmentosa etiopathogenesis
Source: PubMed Central journal article supplement (PMC6226517; doi:10.1038/s41598-018-35086-z), 2018-11-09
Supplement: 41598_2018_35086_MOESM6_ESM.pdf [file 41598_2018_35086_MOESM6_ESM.pdf]

**Manuscript title:**

Non-coding RNAome of RPE cells under oxidative stress suggests unknown regulative aspects of Retinitis pigmentosa etiopathogenesis

**Author list:**

Luigi Donato, Concetta Scimone, Carmela Rinaldi, Rosalia D'Angelo, Antonina Sidoti

| CLC Genomics Workbench                                                                                                                                                                                                                         | TopHat 2                                                                                                                                                                                                                                                                                                                                                                                                                                                                                                                                                                                                                                                                                                                                                                                                                                                                                                                                                                                                                                                                                                                                                                                         | STAR                                                                                                                                                               |
|------------------------------------------------------------------------------------------------------------------------------------------------------------------------------------------------------------------------------------------------|--------------------------------------------------------------------------------------------------------------------------------------------------------------------------------------------------------------------------------------------------------------------------------------------------------------------------------------------------------------------------------------------------------------------------------------------------------------------------------------------------------------------------------------------------------------------------------------------------------------------------------------------------------------------------------------------------------------------------------------------------------------------------------------------------------------------------------------------------------------------------------------------------------------------------------------------------------------------------------------------------------------------------------------------------------------------------------------------------------------------------------------------------------------------------------------------------|--------------------------------------------------------------------------------------------------------------------------------------------------------------------|
| Quality trim limit=0.01<br>Ambiguity trim maximum value=2<br>Map to annotated reference: minimum length fraction and minimum similarity fraction=0.8<br>Maximum number of hits/read=2<br>Type of organism=eukaryote<br>Paired settings=default | Max realign edit distance=1000<br>Max edit distance=2<br>Library Type FR=Unstranded<br>Final read mismatches=2<br>Use bowtie -n mode=No<br>Anchor length (at least 3)=4<br>Maximum number of mismatches that can appear in the anchor region of spliced alignment=0<br>The minimum intron length=40<br>The maximum intron length=2000<br>Allow indel search=Yes<br>Max insertion length=3<br>Max deletion length=3<br>Maximum number of alignments to be allowed=20<br>Minimum intron length that may be found during split-segment (default) search=40<br>Maximum intron length that may be found during split-segment (default) search=2000<br>Number of mismatches allowed in each segment alignment for reads mapped independently=2<br>Minimum length of read segments=25<br>Output unmapped reads=True<br>Do you want to supply your own junction data=No<br>Use coverage-based search for junctions=Yes<br>Minimum intron length that may be found during coverage search=40<br>Maximum intron length that may be found during coverage search=2000<br>Use Microexon Search=Yes<br>Do Fusion Search=Yes<br>Set Bowtie2 settings=No<br>Specify read group=No<br>Job Resource Parameters=No | OutFilterMismatchNoverLmax=0.05<br>OutFilterMatchNmin=16<br>OutFilterScoreMinOverLread=0<br>OutFilterMatchNminOverLread=0<br>AlignIntronMax=1<br>ChimSegmentMin=10 |
